# Supplementary material for: Barcoding success as a function of phylogenetic relatedness in Viburnum, a clade of woody angiosperms
Source: Springer Nature journal article supplement (doi:10.1186/1471-2148-12-73), 2012-01-01
Supplement: 12862_2011_2049_MOESM2_ESM.pdf [file 12862_2011_2049_MOESM2_ESM.pdf]

**Additional File 2.** Summary of interspecific comparisons for four *Viburnum* clades. The name of each clade is followed by the total number of species described in the group. For each clade, the number of species analyzed, the aligned sequence length, the number of variable characters, the number of unique sequences, and the maximum number of species that can be identified by the data (Max ID rate = Identical sequences/total number of species) are reported. Summary statistics of genetic distances using a Kimura 2-parameter (K2P) model include: minimum genetic distance (Min), maximum genetic distance (Max), mean interspecific distance (Mean) with standard deviation (SD), and the proportion of comparisons of genetic distances greater than 1% (>1%) and greater than 2% (>2%).

| Gene Region                                 | Species | Aligned Length | Variable characters | Unique sequences | %Max ID rate | Min     | Max    | Mean (SD)       | > 1%  | > 2%  |
|---------------------------------------------|---------|----------------|---------------------|------------------|--------------|---------|--------|-----------------|-------|-------|
| <b><i>Lantana</i> (15 species)</b>          |         |                |                     |                  |              |         |        |                 |       |       |
| <i>matK</i>                                 | 10      | 719            | 8                   | 4                | 40.00        | 0       | 0.0098 | 0.0026 (0.0037) | 0     | 0     |
| <i>rbcL</i>                                 | 10      | 491            | 1                   | 2                | 20.00        | 0       | 0.0020 | 0.0010 (0.0010) | 0     | 0     |
| <i>rpl32-trnL</i>                           | 9       | 839            | 9                   | 7                | 77.78        | 0       | 0.0073 | 0.0030 (0.0019) | 0     | 0     |
| <i>trnH-psbA</i>                            | 10      | 401            | 4                   | 4                | 40.00        | 0       | 0.0077 | 0.0040 (0.0028) | 0     | 0     |
| <i>trnK</i>                                 | 10      | 1057           | 4                   | 4                | 40.00        | 0       | 0.0028 | 0.0008 (0.0008) | 0     | 0     |
| ITS                                         | 10      | 593            | 34                  | 10               | 100.00       | 0.00169 | 0.0386 | 0.0214 (0.0121) | 71.11 | 55.56 |
| <i>rbcL+matK</i>                            | 10      | 1210           | 9                   | 5                | 50.00        | 0       | 0.0066 | 0.0019 (0.0022) | 0     | 0     |
| <i>rbcL+matK+trnH-psbA</i>                  | 10      | 1614           | 13                  | 8                | 80.0%        | 0       | 0.0069 | 0.0025 (0.0018) | 0     | 0     |
| <i>rbcL+matK+ITS</i>                        | 10      | 1803           | 43                  | 10               | 100.00       | 0.00056 | 0.0160 | 0.0081 (0.0039) | 37.78 | 0     |
| <b><i>Oreinodontotinus</i> (39 species)</b> |         |                |                     |                  |              |         |        |                 |       |       |
| <i>matK</i>                                 | 24      | 719            | 6                   | 6                | 25.00        | 0       | 0.0070 | 0.0014 (0.0015) | 0     | 0     |
| <i>rbcL</i>                                 | 24      | 491            | 2                   | 3                | 12.50        | 0       | 0.0041 | 0.0010 (0.0013) | 0     | 0     |
| <i>rpl32-trnL</i>                           | 26      | 880            | 13                  | 10 (13)          | 38.46        | 0       | 0.0058 | 0.0013 (0.0013) | 0     | 0     |
| <i>trnH-psbA</i>                            | 27      | 403            | 15                  | 10 (18)          | 37.04        | 0       | 0.0237 | 0.0051 (0.0050) | 19.66 | 1.42  |
| <i>trnK</i>                                 | 22      | 1057           | 10                  | 8 (9)            | 36.36        | 0       | 0.0057 | 0.0018 (0.0013) | 0     | 0     |
| ITS                                         | 28      | 597            | 49                  | 22 (24)          | 78.57        | 0       | 0.0328 | 0.0099 (0.0062) | 44.97 | 8.73  |
| <i>rbcL+matK</i>                            | 21      | 1210           | 8                   | 9                | 42.86        | 0       | 0.0050 | 0.0013 (0.0010) | 0     | 0     |
| <i>rbcL+matK+trnH-psbA</i>                  | 22      | 1612           | 22                  | 14 (18)          | 63.63        | 0       | 0.0069 | 0.0022 (0.0016) | 0     | 0     |
| <i>rbcL+matK+ITS</i>                        | 22      | 1805           | 49                  | 20               | 90.90        | 0       | 0.0106 | 0.0041 (0.0023) | 1.30  | 0     |

| Gene Region                         | Species | Aligned Length | Variable characters | Unique sequences | Max ID rate | Min    | Max    | Mean            | > 1%  | > 2%  |
|-------------------------------------|---------|----------------|---------------------|------------------|-------------|--------|--------|-----------------|-------|-------|
| <i>Solenotinus</i> (25 spe.)        |         |                |                     |                  |             |        |        |                 |       |       |
| <i>matK</i>                         | 8       | 719            | 5                   | 3                | 37.50       | 0      | 0.0070 | 0.0017 (0.0021) | 0     | 0     |
| <i>rbcL</i>                         | 10      | 491            | 1                   | 2                | 20.00       | 0      | 0.0021 | 0.0004 (0.0008) | 0     | 0     |
| <i>rpl32-trnL</i>                   | 8       | 841            | 9                   | 6                | 75.00       | 0      | 0.0072 | 0.0032 (0.0019) | 0     | 0     |
| <i>trnH-psbA</i>                    | 12      | 429            | 14                  | 7                | 58.33       | 0      | 0.0213 | 0.0053 (0.0052) | 25.76 | 1.52  |
| <i>trnK</i>                         | 8       | 1057           | 6                   | 4                | 50.00       | 0      | 0.0047 | 0.0016 (0.0016) | 0     | 0     |
| ITS                                 | 11      | 590            | 45                  | 9                | 81.82       | 0      | 0.0604 | 0.0168 (0.0170) | 60.00 | 18.18 |
| <i>rbcL+matK</i>                    | 7       | 1210           | 5                   | 3                | 42.86       | 0      | 0.0041 | 0.0012 (0.0013) | 0     | 0     |
| <i>rbcL+matK+trnH-psbA</i>          | 7       | 1632           | 14                  | 5                | 71.43       | 0      | 0.0056 | 0.0021 (0.0017) | 0     | 0     |
| <i>rbcL+matK+ITS</i>                | 7       | 1800           | 24                  | 7                | 100.00      | 0.0017 | 0.0078 | 0.0045 (0.0021) | 0     | 0     |
| <i>Succodontotinus</i> (33 species) |         |                |                     |                  |             |        |        |                 |       |       |
| <i>matK</i>                         | 19      | 719            | 5                   | 5                | 26.32       | 0      | 0.0042 | 0.0010 (0.0009) | 0     | 0     |
| <i>rbcL</i>                         | 21      | 491            | 5                   | 5                | 22.73       | 0      | 0.0083 | 0.0029 (0.0026) | 0     | 0     |
| <i>rpl32-trnL</i>                   | 19      | 885            | 15                  | 8                | 42.11       | 0      | 0.0084 | 0.0033 (0.0027) | 0     | 0     |
| <i>trnH-psbA</i>                    | 21      | 394            | 3                   | 4                | 19.05       | 0      | 0.0077 | 0.0017 (0.0017) | 0     | 0     |
| <i>trnK</i>                         | 19      | 1068           | 7                   | 5                | 26.32       | 0      | 0.0047 | 0.0011 (0.0013) | 0     | 0     |
| ITS                                 | 18      | 605            | 50                  | 16               | 88.89       | 0      | 0.0369 | 0.0190 (0.0083) | 86.76 | 48.53 |
| <i>rbcL+matK</i>                    | 19      | 1210           | 10                  | 9                | 47.37       | 0      | 0.0058 | 0.0019 (0.0014) | 0     | 0     |
| <i>rbcL+matK+trnH-psbA</i>          | 18      | 1604           | 11                  | 9                | 50.00       | 0      | 0.0057 | 0.0019 (0.0014) | 0     | 0     |
| <i>rbcL+matK+ITS</i>                | 16      | 1815           | 57                  | 16               | 100.00      | 0.0006 | 0.0141 | 0.0072 (0.0032) | 22.86 | 0     |
