# Supplementary figures and images for: Barcoding success as a function of phylogenetic relatedness in Viburnum, a clade of woody angiosperms
Source: Springer Nature journal article supplement (doi:10.1186/1471-2148-12-73), 2012-01-01

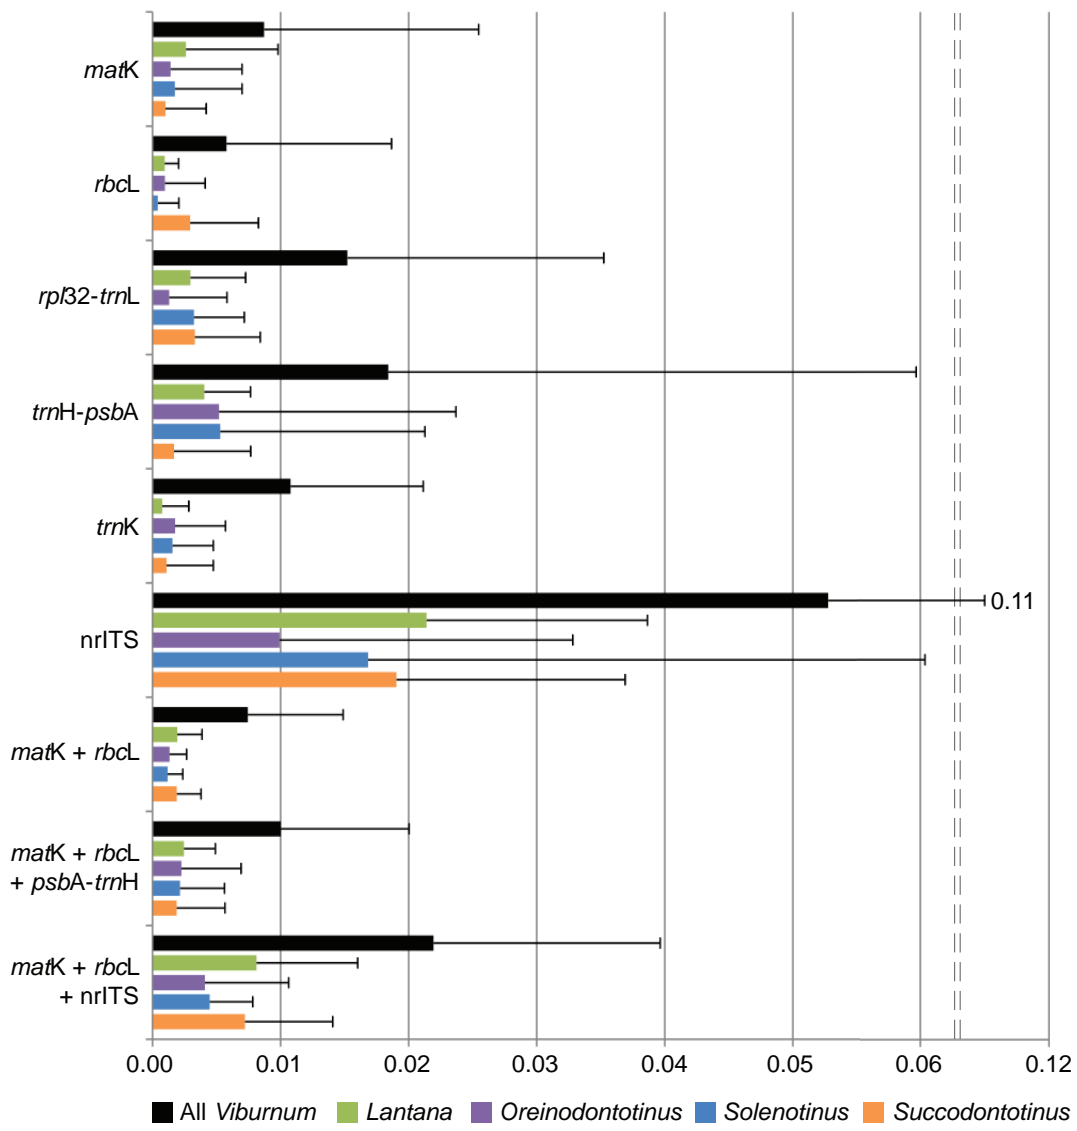

Supplement: 12862_2011_2049_MOESM6_ESM.pdf [file 12862_2011_2049_MOESM6_ESM.pdf]
